# Supplementary material for: A New Computational Model for Neuro-Glio-Vascular Coupling: Astrocyte Activation Can Explain Cerebral Blood Flow Nonlinear Response to Interictal Events
Source: PLoS One. 2016 Feb 5;11(2):e0147292. doi: 10.1371/journal.pone.0147292 (PMC4743967; doi:10.1371/journal.pone.0147292)
Supplement: S1 Table — State variables are specified, together with their initial value (stationary state). Parameter description and values are given in S1 Table. (°) Chosen from [54]. (°°) Chosen to be the average in the range 2070–2630 μM mentioned in [77]. (*) Values obtained by stationary state (baseline) calculation (S3 File). Input is p(t) of Eqs 1 and 2. The integration of this ODE system by numerical methods such as Runge-Kutta 4 leads to the simulation of the output of the model, the total cerebral blood inflow given by fin (t) = 0.8fA(t)+0.2fN(t). (DOC) [file pone.0147292.s008.doc]

| **variable name** | **initial value** | **1st order ordinary differential equation or sigmoid** |
| --- | --- | --- |
| average excitatory post-synaptic potential of main cells | (*) |  |
|  |  |  |
| average inhibitory post-synaptic potential | (*) |  |
|  |  |  |
| average excitatory post-synaptic potential of interneurons | (*) |  |
|  |  |  |
| firing rate of the backward loop on main cells | (*) |  |
| firing rate of main cells | (*) |  |
| firing rate of interneurons | (*) |  |
| glutamate release in the extracellular space | (*) |  |
|  |  |  |
| extracellular glutamate concentration | (*) |  |
| astrocytic glutamate concentration | (°) |  |
| GABA release in the extracellular space | (*) |  |
|  |  |  |
| extracellular GABA concentration | (*) |  |
| astrocytic GABA concentration | (°°) |  |
| neuronal contribution to the cerebral blood flow |  |  |
|  |  |  |
| astrocytes contribution to the cerebral blood flow |  |  |
|  |  |  |
